1 **Gene expression patterns in chordate embryonic development**  
2 **suggest partial applicability of Haeckel's postulates**

3

4 Song Guo<sup>1,†</sup>, Haiyang Hu<sup>2,†</sup>, Chuan Xu<sup>2,†</sup>, Naoki Irie<sup>3,4</sup>, Philipp Khaitovich<sup>1,\*</sup>

5

6 <sup>1</sup> Skolkovo Institute of Science and Technology, 121205, Moscow, Russia

7 <sup>2</sup> CAS Key Laboratory of Computational Biology, CAS-MPG Partner Institute for

8 Computational Biology, Shanghai Institute for Nutrition and Health, CAS, 320 Yue

9 Yang Road, 200031, Shanghai, China.

10 <sup>3</sup> Department of Biological Sciences, University of Tokyo, Tokyo, Japan.

11 <sup>4</sup> Universal Biology Institute, The University of Tokyo, Tokyo, Japan.

12

13 <sup>†</sup> Equally contributed to this work.

14 <sup>\*</sup> Correspondence should be addressed to: P.Khaitovich@skoltech.ru

15

16

17

18

19

20

21 **Abstract**

22 The relationship between embryonic development and evolution historically  
23 investigated based on embryo morphology, could now be reassessed using mRNA  
24 expression endophenotype. Here, we investigated the applicability of von Baer's and  
25 Haeckel's arguments at mRNA expression level by comparing the developmental  
26 changes among nine evolutionarily distinct species: from oyster to mouse. In  
27 agreement with models based on von Baer's postulates, up to 36% of mRNA  
28 expression indicated nearly linear conservation of species' developmental programs.  
29 By contrast, 5-15% of developmental expression profiles, enriched in neural genes,  
30 displayed an alignment pattern compatible with the terminal edition paradigm  
31 proposed by Haeckel. Thus, the development-evolution relationship based on mRNA  
32 expression agrees with early concepts based on embryo morphology and demonstrates  
33 that the corresponding patterns coexist in chordate development.

34

35 **Keywords:** evolution, evo-devo, Haeckel, von Baer, development

36

37 **Introduction**

38 The general relationship between ontogeny and phylogeny, or development and  
39 evolution, has long been discussed. Among cornerstones of the evolutionary  
40 developmental theory are the arguments formulated in von Baer's laws of embryology  
41 and Ernst Haeckel's Biogenetic law. Although von Baer did not accept the concept of

42 evolution, his idea that the earlier stages of embryogenesis reflect shared traits of a  
43 broader taxonomic group(Von Baer, 1828) laid the foundation for the current  
44 evolutionary views on developmental programs' conservation. Ernst Haeckel, who  
45 advocated evolution, proposed in his Biogenetic law that the embryogenesis replays  
46 the species' evolutionary past. Thus, according to this concept, the new developmental  
47 stages will be added to the ancestral embryonic program to produce more recently  
48 evolved species(Haeckel, 1866). After a long debate, the general concept of early  
49 embryogenesis conservation, reflecting a more ancestral stage, continued in a form of  
50 a monotonic developmental conservation model known as the funnel model. More  
51 recently, a developmental conservation model called the developmental hourglass  
52 model was proposed, which placed the most significant stage conservation at a  
53 mid-embryonic part of embryogenesis, defined as the phylotypic period(Duboule,  
54 1994). The applicability of the hourglass model to the conservation of developmental  
55 stages at mRNA expression level has been supported both in animals(Domazet-Loso  
56 & Tautz, 2010; Hu et al., 2017; Irie & Kuratani, 2011; Irie & Sehara-Fujisawa, 2007;  
57 Kalinka et al., 2010) and plants(Cheng, Hui, Lee, Wan Law, & Kwan, 2015; Cridge,  
58 Dearden, & Brownfield, 2016; Quint et al., 2012). Recent studies, however,  
59 demonstrated the applicability of the funnel model or the coexistence and validity of  
60 both funnel and hourglass models at different levels of trait evolution in  
61 vertebrates(Artieri, Haerty, & Singh, 2009; Bininda-Emonds, Jeffery, & Richardson,  
62 2003; Comte, Roux, & Robinson-Rechavi, 2010; Hu et al., 2017; Levin et al., 2016;  
63 Piasecka, Lichocki, Moretti, Bergmann, & Robinson-Rechavi, 2013; Roux &

64 Robinson-Rechavi, 2008; Uesaka, Kuratani, Takeda, & Irie, 2019). Even the broadly  
65 criticized Biogenetic law, has been pointed out to have potential applicability of its  
66 principles(Richardson & Keuck, 2002).

67 One of the major barriers in testing the relationship between development and  
68 evolution, including the applicability of concepts proposed in Biogenetic law or the  
69 von Baer's law of embryology, is the difficulty in identifying  
70 evolutionarily-homologous developmental stages among distant species. While  
71 pioneering studies focused on the investigation of embryonic morphology(Jeffery,  
72 Bininda-Emonds, Coates, & Richardson, 2002), recent works relied on developmental  
73 changes in mRNA expression profiles as an informative endophenotype(Bozinovic,  
74 Sit, Hinton, & Oleksiak, 2011; J. J. Li, Huang, Bickel, & Brenner, 2014; Piasecka et  
75 al., 2013; Yanai, Peshkin, Jorgensen, & Kirschner, 2011). The use of gene expression  
76 facilitates inter-species comparisons, as orthologous genes can be matched among  
77 species, and their expression profiles could be traced at all stages of development.  
78 Several studies examined developmental gene expression patterns in  
79 mammals(Wagner, Tabibiazar, Liao, & Quertermous, 2005), vertebrates(Piasecka et  
80 al., 2013), chordates(Levin et al., 2016; Yanai et al., 2011), and fruit fly  
81 species(Tomancak et al., 2007). These studies, however, either focused on gene  
82 expression patterns within a specific species or compared developmental stage  
83 conservation within the concepts of the hourglass model paradigm.

84 Here, we directly tested the compatibility of developmental expression patterns  
85 with predictions of the Biogenetic law and von Baer's law of embryology. To do so,  
86 we performed temporal alignment of mRNA developmental expression trajectories  
87 among eight chordate species and oyster. Haeckel's Biogenetic law proposing the  
88 addition of new parts to the ancestral developmental program (terminal addition)  
89 could be described as a "progressive" developmental model concerning the  
90 ontogenetic gene expression pattern alignment. By contrast, Baer's law and its later  
91 modifications presume the existence of a general developmental program spanning  
92 the entire development, while more conserved at early embryonic stages. Such a  
93 model could be termed as a "continuous" developmental model concerning the  
94 ontogenetic gene expression pattern alignment.

95

## 96 **Results**

### 97 *Alignment of developmental gene expression patterns among species*

98 We investigated the relationship between ontogeny and phylogeny of chordate species  
99 at the level of molecular phenotype using RNA-sequencing (RNA-seq) data collected  
100 over the entire course of embryonic development in eight chordate species of different  
101 organizational complexity (amphioxus, ciona, zebrafish, two species of frogs, turtle,  
102 chicken, and mouse) and an outgroup species (oyster)(Hu et al., 2017; Zhang et al.,  
103 2012). In each species, the data were collected at 11 to 20 developmental stages and

104 measured in duplicates (Figure 1A; Supplementary file 1: Table S1 and Figure  
105 1A–figure supplement 1).

106 Within species, differences among developmental stages explained approximately  
107 90% of total expression variation (Figure 1B,C and Figure 1C–figure supplement 2).  
108 By contrast, other factors, such as biological replicates and sequence coverage,  
109 explained 1% and 0.6% of variation each (Figure 1B). Accordingly, on average, 85%  
110 of detected genes showed significant expression differences among developmental  
111 stages in each species (development-related genes) (polynomial test,  
112 Benjamini-Hochberg (BH) corrected  $p < 0.05$ ; Figure 1D and Figure 1D -Source data  
113 1).

114 We searched for the best temporal alignment between each pair of species using  
115 genes preferentially expressed at a particular developmental stage (stage-associated  
116 genes; Methods; Supplementary file 2: Table S2)(J. J. Li et al., 2014). Surprisingly,  
117 despite substantial differences in organizational complexity, an approximately linear  
118 alignment of developmental stages was a dominant stage-matching pattern in each  
119 pair of species (Figure 1E and Figure 1E–figure supplement 3,4).

## 120 ***Two alternative evolutionary models of species' development***

121 We next sought to test, from the perspective of gene expression, two models, the  
122 progressive and continuous one, describing embryogenesis rooted in von Baer's and  
123 Haeckel's ideas. Specifically, we based the progressive model (PM) on Haeckel's  
124 postulate that embryogenesis replays the evolutionary history of the species. Based on

125 this view, the developmental gene expression profiles of a species with more ancestral  
126 body plan organization will align the best to early embryonic stages of species with  
127 more recently evolved organization, "replaying" the evolutionary history of this body  
128 plan (Figure 2A; Figure 2A–figure supplement 5). By contrast, evolutionary  
129 developmental models rooted in von Baer's ideas, such as the hourglass and the funnel  
130 model, presume general preservation of the developmental profiles across species  
131 (Figure 2A). Accordingly, we based an alternative continuous model (CM) on this  
132 assumption, thus predicting the best alignment between complete, non-truncated,  
133 developmental expression profiles of the species.

134 We found that out of all development-related genes that aligned significantly to  
135 the mouse developmental trajectory, 19-36% aligned linearly, thus behaving in  
136 agreement with the continuous model predictions (CM genes) (correlation test,  $r > 0.7$ ,  
137  $p < 0.05$ ; Figure 2B,E; Figure 2B–figure supplement 6 and Figure 2E – source data 1).  
138 By contrast, 5-15% of development-related genes aligned significantly better to the  
139 truncated sets (PM genes) (permutations, BH-corrected  $p < 0.05$ ; Figure 2B,C,E;  
140 Figure 2B–figure supplement 6 and Figure 2E – source data 2). Further, in each  
141 pairwise alignment, PM genes did not align uniformly to all shortened mouse  
142 developmental intervals but tended to peak at a particular fragment. For instance,  
143 oyster PM genes aligned best to the mouse developmental fragments ending at stages  
144 3-4, while amphioxus PM genes – to the fragments ending at stages 5-6 (Figure 2B,C  
145 and Figure 2C–figure supplement 7). Overall, PM genes in species evolutionarily

146 proximal to the mouse tended to align to increasingly longer truncated mouse  
147 developmental sets (Figure 2D). This phylogenetic ordering of ontogenetic patterns  
148 was not caused by the alignment procedure, which was not biased to any  
149 developmental stage, and robust to the use of evolutionarily old genes present in each  
150 of the nine investigated species (Supplementary file 3: Figure S1). At the same time,  
151 this phenomenon matches the phylogeny-ontogeny relationship among multiple  
152 species proposed by Haeckel, even though we did not include this aspect in PM model  
153 formulation. By contrast, repeating the alignment procedure using species with more  
154 ancient body plans, such as amphioxus or ciona, instead of the mouse, did not yield a  
155 consistent significant excess of genes following PM predictions (Supplementary file 4:  
156 Figure S2).

### 157 *Properties of CM and PM genes*

158 While we defined CM and PM gene sets independently for each species, each set  
159 overlapped significantly between species (Methods, subsampling,  
160 Bonferroni-corrected  $p < 0.05$ ; Supplementary file 5: Table S3), indicating the  
161 conservation of CM and PM patterning across chordate embryogenesis and  
162 presumably convergent functionality specific to each model.

163 Indeed, CM genes showed enrichment in Gene Ontology (GO) terms  
164 corresponding to general cellular functions, such as spliceosome, RNA transport,  
165 DNA replication, and several metabolic processes (Hypergeometric test,  $p < 0.05$ ;  
166 Figure 2F – source data 1). By contrast, PM genes were primarily enriched in neural



167 functions, including axon guidance, glutamatergic synapse, dopaminergic synapse,  
168 and MAPK signaling pathways (Hypergeometric test,  $p < 0.05$ ; Figure 2F and Figure  
169 2F – source data 1). In line with functional enrichment results, expression of CM  
170 genes displayed significantly lower tissue-specificity in mouse (B. Li et al., 2017)  
171 compared to PM genes, and all expressed genes (one-sided Fisher's exact test,  $p <$   
172  $0.05$ ; Supplementary file 6: Figure S3). Nonetheless, PM genes were more conserved  
173 at the amino acid sequence level compared to CM genes (Ka/Ks, one-sided Wilcoxon  
174 rank-sum test,  $p < 0.0005$ ) (Figure 2G and Figure 2G–figure supplement 8,9).

### 175 *Visualization of developmental expression patterns*

176 We next investigated developmental expression trajectories of the 244 orthologous  
177 genes classified as development-related in all nine species using the nearly linear,  
178 species' alignment (Figure 3A). These genes were grouped into six clusters based on  
179 their developmental profiles in the unsupervised clustering analysis (Figure 3B).  
180 Remarkably, 66% of the genes fell within a single cluster representing a decreasing  
181 expression pattern conserved across all nine species (CL9.1) (Figure 3C). By contrast,  
182 the expression trajectories in the other clusters differed more among species, with the  
183 extent of differences being directly proportional to corresponding phylogenetic  
184 distances (Figure 3E and Figure 3E–figure supplement 10). Accordingly, CL9.1 genes  
185 substantially overlapped with CM genes (one-sided Fisher's exact test, odds ratio = 3,  
186  $p < 0.0001$ ) and were shown in the same biological processes as CM genes, including  
187 spliceosome and RNA processing (Supplementary file 7: Table S4).

188 The same analysis conducted using 2,038 development-related orthologs shared  
189 among six vertebrate species revealed a CL9.1-like developmental pattern represented  
190 by a single cluster (CL6.1) (Figure 3D). Genes in clusters CL9.1 and CL6.1  
191 overlapped significantly and were enriched in similar GO terms (Figure 3F and  
192 Supplementary file 8: Table S5).

193 The second-largest cluster found in vertebrates (CL6.2) showed an opposite,  
194 ascending expression pattern conserved among species and contained genes enriched  
195 in signaling pathways, such as cGMP-PKG signaling pathway, oxytocin signaling  
196 pathway, and Renin secretion (Supplementary file 8: Table S5). Notably, this cluster  
197 overlapped with the chordate cluster CL9.4, where the ascending pattern was  
198 conserved among the seven species, excluding ciona and oyster (Figure 3C).

199

## 200 **Discussion**

201 Our goal was to explore the general relationship between ontogeny and phylogeny  
202 based on the comparison of developmental gene expression trajectories among nine  
203 species separated by approximately 800 million years of evolution. Our results  
204 indicate that developmental patterns consistent with evolutionary models rooted in  
205 von Baer's and Haeckel's ideas match approximately half of all detected mRNA  
206 developmental expression profiles. Between the two historical concepts, the  
207 continuous developmental model consistent with Baer's arguments was nearly  
208 three-fold more prominent compared to the progressive model compatible with the

209 Biogenetic law. Still, a measurable fraction of genes displayed the developmental  
210 expression pattern matching Haeckel's predictions, indicating the need for a further  
211 critical assessment of this historical concept. These results do not conflict with the  
212 hourglass model of development. Our previous work demonstrated the applicability of  
213 this model to all nine species' development(Hu et al., 2017). While the hourglass  
214 model compares relative conservation of developmental stages, we focused on the  
215 alignment of expression differences among stages.

216 Expression profiles conserved along the entire species' development included  
217 two main patterns: a gradual decrease conserved among all nine species and gradual  
218 increase conserved among six vertebrates. The conserved downward pattern coincides  
219 with the reported preferential expression of evolutionary older genes at earlier  
220 developmental stages(Gao et al., 2018). Consistently, genes forming this pattern tend  
221 to display ubiquitous expression among tissues and are involved in essential functions,  
222 such as RNA processing (Supplementary file 9: Figure S4). Further, a study  
223 examining embryonic gene expression reported the existence of such a pattern in  
224 isolated mouse tissues(Sarropoulos, Marin, Cardoso-Moreira, & Kaessmann, 2019),  
225 indicating that the descending expression reflects alterations within embryo tissues  
226 rather than changes in embryo composition. Overall, expression patterns conserved  
227 between species over the entire development involve 19-36% of orthologous  
228 development-related genes detected in our study, constituting the major alignment  
229 trend.

230 The second prominent type of developmental relationship among species,  
231 involving 5-15% of orthologous development-related genes, was generally consistent  
232 with predictions of Haeckel's Biogenetic law. According to Haeckel's views, the best  
233 developmental alignment should match stages reflecting the phylogenetic history of the  
234 species, rather than the entire developmental span. When aligning developmental  
235 profiles of eight species to the mouse, we indeed observed this phenomenon. First, for  
236 this gene group, the developmental expression profiles indeed aligned the best to the  
237 truncated mouse developmental series lacking late stages. Second, for each species,  
238 these alignments peaked at a particular shortened mouse developmental fragment,  
239 with species phylogenetically more distant from the mouse aligning best to the  
240 increasingly shorter mouse developmental sets. Intriguingly, while all species evolved  
241 their developmental programs after branching from the common ancestor, a mirror  
242 procedure, alignment to the fragmented developmental series of amphioxus and ciona  
243 representing more ancient body plans, revealed potential PM genes in only two of 16  
244 alignments (Supplementary file 4: Figure S2). Further, there was no relationship  
245 between the length of the best-aligning developmental fragment and the phylogenetic  
246 distance between species.

247 Similar to the linearly-aligning genes, genes displaying this "Haeckelian"  
248 expression behavior overlapped significantly between species (Supplementary file 5:  
249 Table S3), indicating their potential functional conservation. These genes were indeed  
250 more conserved at the amino acid sequence level than the linearly-aligning genes and

251 displayed enrichment in specialized functions, such as synaptic signaling and  
252 secretion.

253 Our work highlights the usefulness of quantitative endophenotypes as an essential  
254 complement to morphology-based developmental studies. It further suggests partial  
255 applicability of Haeckel's ideas to a fraction of developmental expression differences  
256 involving genes associated with neural functions.

257

## 258 **Methods**

### 259 *RNA-seq data processing*

260 All data in this analysis were downloaded from Hu et al.(Hu et al., 2017). We adopted  
261 the same methods to quantify gene expression. In brief, we got the RNA-seq data of  
262 *Crassostrea gigas* from GEO database (accession number SRP014559)(Zhang et al.,  
263 2012), and the rest of species from DDBJ (accession number DRA003460)  
264 (Supplementary file 1: Table S1). To quantify gene expression, we mapped RNA-seq  
265 reads to the corresponding genome (Supplementary file 1: Table S1) using Tophat  
266 (v2), allowing up to three mismatches and indels, except for *Ciona* (Ci). In the case of  
267 *Ciona*, we mapped reads to the genome with up to five mismatches and indels as the  
268 *Ciona* RNA-seq data and the genome data have slightly lower quality compared to the  
269 rest.

270 To define the expressed genes, we required the maximal expression across all  
271 development stages exceeding 1 FPKM. For each stage, we calculated expression as  
272 the mean of expression of the replicated samples. More than 70% of coding genes  
273 annotated for a given species were reliably detected, except for amphioxus (41%)  
274 (Supplementary file 10: Table S6).

### 275 *Identification of development-related genes*

276 We defined developmental alterations of gene expression levels using polynomial  
277 regression models following the method described in Somel et al.(Somel et al., 2009).  
278 For each gene, we chose the best regression model with the developmental stage (by

279 rank) as predictor and expression level as a response with Benjamini-Hochberg  
280 corrected  $p < 0.05$ . The genes that fit a significant regression model were termed as  
281 development-related genes (Figure 1D -Source data 1).

### 282 *Identification of stage-associated genes*

283 We defined genes preferentially expressed at a particular developmental stage as  
284 stage-associated genes in each species following the method described in(Hu et al.,  
285 2017; J. J. Li et al., 2014). For each species, we required FPKM (fragments per  
286 kilobase of exon model per million reads mapped)  $> 2$  at a particular stage and  
287 Z-score (normalized FPKM across samples) representing the difference between this  
288 stage and the rest of stages  $> 1.5$ . On average, 65%-90% of genes expressed in  
289 development were identified as stage-associated genes (Supplementary file 2: Table  
290 S2).

### 291 *Alignment of mouse developmental stage sets to developmental profiles of other species*

292 To assess the transcriptome similarity in the course of developmental stages between  
293 mouse (Mm) and other species, we used stage-associated and 1:1 orthologous genes  
294 to align the developmental stages between mouse and other species followed by the  
295 method reported in(Hu et al., 2017; J. J. Li et al., 2014). The detailed description can  
296 be found in the supplementary materials of(Hu et al., 2017; J. J. Li et al., 2014). In  
297 brief, we calculated the pairing score using the hypergeometric test to evaluate the  
298 ratio of orthologs overlapping within the stage-associated genes pairwise. The pairing  
299 score can be written as:

300 Paring score =  $-\log_{10}$  (Bonferroni corrected P-values)

301 The paring score was used to quantify the significance of the overlap on each pairwise  
302 stage comparison between the mouse and another species. From the paring score, we  
303 identified the relationship between mouse and other species (Figure 1E). To check the  
304 stability of this relationship, we repeated the comparison 500 times with randomly  
305 assigned stage-associated genes for each stage of each species using the same  
306 procedure.

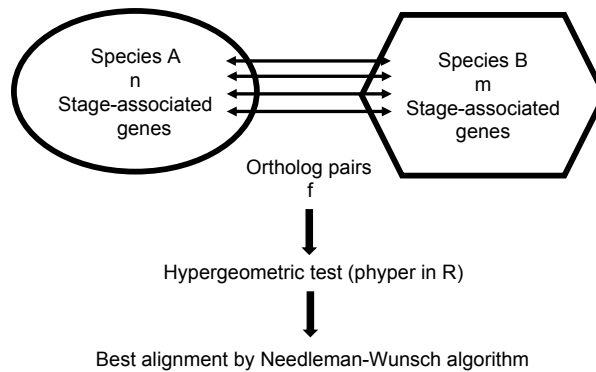

307

308 According to the above scheme, we further assigned the corresponding stage  
309 alignment between mouse and other species using the Needleman-Wunsch algorithm  
310 with the gap penalty equal to one. To estimate the stability of alignment based on the  
311 mean of the replicates, we randomly chose one individual per stage, aligned two  
312 species 500 times, and calculated the frequency for each pair of alignment. The  
313 resulting frequency was presented by the thickness of the line in Figure 3A.

314

315 *Identification of CM/PM genes*



316 To identify genes with expression trajectories compatible with the continuous model  
317 (CM) or progressive model (PM) predictions, we considered development-related  
318 genes as mentioned in “*Identification of development-related genes*” with existing  
319 orthologs between mouse and any other species. We then linearly aligned the  
320 complete set of developmental stages in a given species (oyster, amphioxus, ciona,  
321 zebrafish, frogs, turtle, and chicken) to the increasingly truncated sets of mouse  
322 developmental stages, i.e., from first two to all 17 stages (Figure 2A–figure  
323 supplement 5). To this end, we interpolated 20 time points uniformly distributed  
324 across the whole ontogeny of non-mouse species using cubic smoothing spline (with  
325 three degrees of freedom for amphioxus data and six degrees of freedom for other  
326 species) or polynomial regression curves (up to the fourth degree). The two methods  
327 for interpolating expression values across development were used to ensure the  
328 robustness of our CM or PM predictions. Of note, during cubic smoothing spline, the  
329 degrees of freedom chosen for amphioxus were fewer than other species, due to the  
330 relatively fewer sampled developmental stages of this species; whereas during  
331 polynomial regression, we chose up to four degrees to take advantage of the  
332 near-fitness of polynomial regression in most time series data.

333 We then aligned the resulting expression trajectories to the gradually increasing  
334 sets of mouse developmental stages, where the expression trajectory was interpolated  
335 using the same approach (cubic smoothing spline with six degrees of freedom or  
336 polynomial regression with up to the fourth degree). The alignments with the Pearson  
337 correlation coefficient (PCC) greater than 0.7 and correlation test  $p$ -value less than

338 0.05 were considered as valid. We further selected the alignment with the maximum  
339 PCC among all valid alignments as the ultimate one. Genes failing to pass the two  
340 alignment criteria were considered as non-aligned, regardless of the complete or  
341 partial linear alignment paradigms.

342       Based on the above classification procedure, we summarized for each species, the  
343 number of genes aligning to each set of developmental stages of the mouse.  
344 Furthermore, we repeated the classification process by shuffling the orthologous  
345 relationships between non-mouse species and the mouse (Figure 2B–figure  
346 supplement 6). Specifically, we expected that by shuffling, each developmental stage  
347 of the mouse would be equally represented in other species, allowing us to calculate  
348 the random expectation of alignment occurrences for each stage. Thus, the final  
349 number of genes aligning to each set of developmental stages of the mouse was  
350 obtained after subtracting these background contaminations. Genes adhering to the  
351 continuous model (CM) were defined as those best aligned between mouse and other  
352 species over the complete developmental intervals. By contrast, genes following the  
353 progressive model (PM) were defined by the following criteria: i) aligned best to a  
354 truncated set of mouse developmental stages; ii) displayed a significantly greater  
355 number of aligning genes compared to the background distributions, determined using  
356 a BH-corrected *p*-value of less than 0.05 as a cutoff; and iii) an increase in the number  
357 of genes aligning to particular sets of mouse stages compared to its adjacent sets  
358 (Figure 2A, Figure 2E – source data 1 and Figure 2E – source data 2).

359 To further check the robustness of the alignment results, we restricted our  
360 analysis to evolutionarily old genes. To do so, we repeated the alignment procedure  
361 using a subset of the development-related genes with inferred Earliest Ortholog Level  
362 (EOL) < level 10. This conservation level corresponds to genes that appeared and  
363 became fixed within the genomes before the separation of Chordata(Litman & Stein,  
364 2019).

#### 365 *Overlap of CM/PM genes between species*

366 To calculate the significance of the overlap of CM or PM genes between species, we  
367 sampled the same number of CM or PM genes in each species from all  
368 development-related genes 1,000 times and recalculated the number of overlapping  
369 genes to obtain the empirical distribution. The overlap significance  $p$ -value was  
370 calculated as the proportion of the values, which were as larger or greater than the  
371 actual overlapping gene number. Given all pairs of species involved, a  
372 Bonferroni-corrected  $p$ -value of less than 0.05 was used as the cutoff of the overlap  
373 significance (Supplementary file 5: Table S3).

#### 374 *Amino acid conservation of CM/PM gene*

375 We compared the evolutionary conservation between proteins encoded by CM and  
376 PM genes using the Ka/Ks metric(Yang & Nielsen, 2000). Since in this study, we are  
377 not studying Ka/Ks variations across the evolutionary branches – we focused on the  
378 comparisons of PM versus CM genes within each individual species, we conducted  
379 this analysis mainly in a pairwise manner between a given species and mouse. Firstly,

380 we extracted the coding sequences of each gene based on the corresponding  
381 annotation information and then translated the sequences into amino acid sequences  
382 using the function "translate" implemented in the Bioconductor package "Biotrings".  
383 The longest protein sequence was selected as the gene protein sequence. Next, we  
384 performed protein sequence alignments between non-mouse species and the mouse  
385 using the function "pairwiseAlignment" in "Biostrings", with the scoring matrix set as  
386 BLOSUM50. The resulting protein alignment was translated to the nucleotide level  
387 and used as the input for PAML(Yang, 1997) for a Ka/Ks analysis output. This  
388 procedure was conducted in a pairwise manner for the mouse and a given non-mouse  
389 species to match the corresponding definitions of PM and CM genes carried out in a  
390 pairwise manner (Figure 2G–figure supplement 8). To test the robustness of our  
391 Ka/Ks calculations in the context of multiple species, we performed multiple  
392 sequence alignment using Clustal Omega(Sievers et al., 2011) for all protein  
393 sequences mentioned above convert to nucleotide levels. We next utilized the  
394 CODEML application in PAML to calculate the Ka/Ks for given cross-species  
395 ortholog. The significance of the difference between PM and CM genes in each  
396 species was assessed using one-sided Wilcoxon rank-sum test (Figure 2G–figure  
397 supplement 9).

#### 398 *Gene expression interpretation to mouse developmental stage*

399 To compare the similarity of the expression profiles across developmental stages of  
400 nine species, we used the predicted developmental stage alignment presented in Figure

401 3A to create a unified alignment of eight species to the mouse developmental curves.

402 To do so, we mapped 33 stages cumulatively interpolated from eight species to the full

403 mouse developmental curve fitted using cubic smoothing spline with ten degrees of

404 freedom. We then compared gene expression curves among nine species based on

405 z-transformed expression of each gene interpolated at these 33 stage points.

#### 406 *Clustering of gene expression profiles in six vertebrate and nine chordate species*

407 To investigate the expression pattern diversity in nine or six species, we used

408 hierarchical clustering (hclust function in R) of z-transformed gene expression

409 trajectories aligned among species with  $(1 - \rho)$  as the distance measure, where  $\rho$  is

410 the Spearman correlation coefficient. We chose  $k$  equal six, as optimal, based on visual

411 inspection of clusters obtained using different  $k$  values.

#### 412 *Functional annotation of developmental expression patterns*

413 To check the functions of genes in each cluster, we applied Gene Ontology (GO) and

414 Kyoto Encyclopedia of Genes and Genomes (KEGG)(Kanehisa & Goto, 2000)

415 enrichment tests. GO annotation of mouse genes was downloaded from Bioconductor

416 package 'org.Mm.eg.db'. Mouse pathway annotation was downloaded from

417 <http://rest.kegg.jp/list/pathway/> and <http://rest.kegg.jp/link/genes/>.

418 For GO enrichment test, the "elim" algorithm of topGO(Alexa & Rahnenfuhrer,

419 2016) was chosen to eliminate the hierarchical dependency of the GO terms. Fisher's

420 exact test was applied for each GO term. The background set consisted of all

421 development-related genes orthologous among six vertebrate species (2,038 genes) and

422 nine chordate species (244 genes), respectively. For the test of vertebrate gene clusters,  
423 Benjamini-Hochberg correction on “molecular function”, “biological process”, and  
424 “cellular component” was applied independently. GO terms with BH corrected  $p <$   
425 0.05 were reported. We applied no multiple test correction to chordate’ gene cluster  
426 enrichment analysis due to low statistical power of the dataset and used a more  
427 stringent nominal  $p$ -value cutoff of  $p < 0.001$ .

428 For the pathway enrichment test, the reference genes were the same as for  
429 GO-based analysis. We used hypergeometric test (phyper in R) to assess the  
430 enrichment in each KEGG pathway. Bonferroni correction was applied for genes in  
431 vertebrate clusters. Pathways with corrected  $p < 0.05$  were reported as significantly  
432 enriched. No correction was applied to genes from chordate clusters due to low  
433 statistical power, and the nominal pathway enrichment  $p$ -value was set to  $p < 0.05$ . This  
434 relaxed cutoff was used to assess the potential overlap between enriched functions  
435 found in vertebrate and chordate clusters (Supplementary file 8: Table S5).

#### 436 *Species tree construction*

437 The species tree was generated under the web <https://phylot.biobyte.de/> with NCBI  
438 taxonomy IDs (10090, 9031, 13735, 8364, 7955, 7719, 8355, 7739, 29159).

439 The species separation time to the mouse was obtained from  
440 <http://www.timetree.org/> (Kumar, Stecher, Suleski, & Hedges, 2017).

441

442

443 *Statistical analysis and software*

444 Analyses were conducted in the R environment (<http://www.r-project.org/>). To  
445 minimize the type I error rate, we used multiple test correction for  $p$ -value calculations,  
446 unless specifically indicated otherwise. The statistically significant level used for each  
447 was specified in the main text. Additionally, we used Perl, Python, and R packages,  
448 including ‘topGO’, ‘reshape’, ‘RColorBrewer’, ‘ggplot2’, ‘Biotrings’, as well as shell  
449 scripts, in the analyses. Pathway visualization was conducted under  
450 <https://pathview.uncc.edu/> for the spliceosome pathway.

451

## 452 **Acknowledgments**

453 We thank Michael Lachmann for inspiring this study, Zhisong He, Qian Li and  
454 Qianhui Yu for helpful discussions, and Pavel Mazin for critical comments.

455

## 456 **Funding**

457 This work was supported by the National Natural Science Foundation of China  
458 (Grants 91331203 and 31420103920 to P.K.); the National One Thousand Foreign  
459 Experts Plan (Grant WQ20123100078 to P.K.); and Grant-in-Aid for Scientific  
460 Research on Innovative Areas (17H06387 to N.I.).

461

462

463 **Author contribution**

464 S.G, HY.H and C.X designed and executed the bioinformatics analysis. S.G and PK

465 wrote the manuscript. N.I and P.K revised the manuscript. PK supervised the project.

466

467 **Conflict of interest**

468 The authors declare no conflict of interest.

469



470 **References**

- 471 Alexa, A., & Rahnenfuhrer, J. (2016). topGO: enrichment analysis for Gene Ontology.  
472 R Packag. version 2.26.0. *R Package version 2.26.0*.
- 473 Artieri, C. G., Haerty, W., & Singh, R. S. (2009). Ontogeny and phylogeny:  
474 molecular signatures of selection, constraint, and temporal pleiotropy in the  
475 development of *Drosophila*. *BMC Biol*, 7, 42. doi:10.1186/1741-7007-7-42
- 476 Bininda-Emonds, O. R., Jeffery, J. E., & Richardson, M. K. (2003). Inverting the  
477 hourglass: quantitative evidence against the phylotypic stage in vertebrate  
478 development. *Proc Biol Sci*, 270(1513), 341-346. doi:10.1098/rspb.2002.2242
- 479 Bozinovic, G., Sit, T. L., Hinton, D. E., & Oleksiak, M. F. (2011). Gene expression  
480 throughout a vertebrate's embryogenesis. *BMC Genomics*, 12, 132.  
481 doi:10.1186/1471-2164-12-132
- 482 Cheng, X., Hui, J. H., Lee, Y. Y., Wan Law, P. T., & Kwan, H. S. (2015). A  
483 "developmental hourglass" in fungi. *Mol Biol Evol*, 32(6), 1556-1566.  
484 doi:10.1093/molbev/msv047
- 485 Comte, A., Roux, J., & Robinson-Rechavi, M. (2010). Molecular signaling in  
486 zebrafish development and the vertebrate phylotypic period. *Evol Dev*, 12(2),  
487 144-156. doi:10.1111/j.1525-142X.2010.00400.x
- 488 Cridge, A. G., Dearden, P. K., & Brownfield, L. R. (2016). Convergent occurrence of  
489 the developmental hourglass in plant and animal embryogenesis? *Ann Bot*, 117(5),  
490 833-843. doi:10.1093/aob/mcw024

- 491 Domazet-Lošo, T., & Tautz, D. (2010). A phylogenetically based transcriptome age  
492 index mirrors ontogenetic divergence patterns. *Nature*, *468*(7325), 815-818.  
493 doi:10.1038/nature09632
- 494 Duboule, D. (1994). Temporal colinearity and the phylotypic progression: a basis for  
495 the stability of a vertebrate Bauplan and the evolution of morphologies through  
496 heterochrony. *Dev Suppl*, 135-142.
- 497 Gao, L., Wu, K., Liu, Z., Yao, X., Yuan, S., Tao, W., . . . Liu, J. (2018). Chromatin  
498 Accessibility Landscape in Human Early Embryos and Its Association with  
499 Evolution. *Cell*, *173*(1), 248-259 e215. doi:10.1016/j.cell.2018.02.028
- 500 Haeckel, E. (1866). *Generelle Morphologie der Organismen*. Berlin: Georg Reimer.
- 501 Hu, H., Uesaka, M., Guo, S., Shimai, K., Lu, T. M., Li, F., . . . Consortium, E. (2017).  
502 Constrained vertebrate evolution by pleiotropic genes. *Nat Ecol Evol*, *1*(11),  
503 1722-1730. doi:10.1038/s41559-017-0318-0
- 504 Irie, N., & Kuratani, S. (2011). Comparative transcriptome analysis reveals vertebrate  
505 phylotypic period during organogenesis. *Nat Commun*, *2*, 248.  
506 doi:10.1038/ncomms1248
- 507 Irie, N., & Sehara-Fujisawa, A. (2007). The vertebrate phylotypic stage and an early  
508 bilaterian-related stage in mouse embryogenesis defined by genomic information.  
509 *BMC Biol*, *5*, 1. doi:10.1186/1741-7007-5-1
- 510 Jeffery, J. E., Bininda-Emonds, O. R., Coates, M. I., & Richardson, M. K. (2002).  
511 Analyzing evolutionary patterns in amniote embryonic development. *Evol Dev*,  
512 *4*(4), 292-302. doi:10.1046/j.1525-142x.2002.02018.x

- 513 Kalinka, A. T., Varga, K. M., Gerrard, D. T., Preibisch, S., Corcoran, D. L., Jarrells,  
514 J., . . . Tomancak, P. (2010). Gene expression divergence recapitulates the  
515 developmental hourglass model. *Nature*, 468(7325), 811-814.  
516 doi:10.1038/nature09634
- 517 Kanehisa, M., & Goto, S. (2000). KEGG: kyoto encyclopedia of genes and genomes.  
518 *Nucleic Acids Res*, 28(1), 27-30. doi:10.1093/nar/28.1.27
- 519 Kumar, S., Stecher, G., Suleski, M., & Hedges, S. B. (2017). TimeTree: A Resource  
520 for Timelines, Timetrees, and Divergence Times. *Molecular Biology and*  
521 *Evolution*, 34(7), 1812-1819. doi:10.1093/molbev/msx116
- 522 Levin, M., Anavy, L., Cole, A. G., Winter, E., Mostov, N., Khair, S., . . . Yanai, I.  
523 (2016). The mid-developmental transition and the evolution of animal body plans.  
524 *Nature*, 531(7596), 637-641. doi:10.1038/nature16994
- 525 Li, B., Qing, T., Zhu, J., Wen, Z., Yu, Y., Fukumura, R., . . . Shi, L. (2017). A  
526 Comprehensive Mouse Transcriptomic BodyMap across 17 Tissues by RNA-seq.  
527 *Sci Rep*, 7(1), 4200. doi:10.1038/s41598-017-04520-z
- 528 Li, J. J., Huang, H., Bickel, P. J., & Brenner, S. E. (2014). Comparison of D.  
529 melanogaster and C. elegans developmental stages, tissues, and cells by  
530 modENCODE RNA-seq data. *Genome Res*, 24(7), 1086-1101.  
531 doi:10.1101/gr.170100.113
- 532 Litman, T., & Stein, W. D. (2019). Obtaining estimates for the ages of all the  
533 protein-coding genes and most of the ontology-identified noncoding genes of the

- 534 human genome, assigned to 19 phylostrata. *Seminars in Oncology*, 46(1), 3-9.  
535 doi:10.1053/j.seminoncol.2018.11.002
- 536 Piasecka, B., Lichocki, P., Moretti, S., Bergmann, S., & Robinson-Rechavi, M. (2013).  
537 The hourglass and the early conservation models--co-existing patterns of  
538 developmental constraints in vertebrates. *PLoS Genet*, 9(4), e1003476.  
539 doi:10.1371/journal.pgen.1003476
- 540 Quint, M., Drost, H. G., Gabel, A., Ullrich, K. K., Bonn, M., & Grosse, I. (2012). A  
541 transcriptomic hourglass in plant embryogenesis. *Nature*, 490(7418), 98-101.  
542 doi:10.1038/nature11394
- 543 Richardson, M. K., & Keuck, G. (2002). Haeckel's ABC of evolution and  
544 development. *Biol Rev Camb Philos Soc*, 77(4), 495-528.  
545 doi:10.1017/s1464793102005948
- 546 Roux, J., & Robinson-Rechavi, M. (2008). Developmental constraints on vertebrate  
547 genome evolution. *PLoS Genet*, 4(12), e1000311.  
548 doi:10.1371/journal.pgen.1000311
- 549 Sarropoulos, I., Marin, R., Cardoso-Moreira, M., & Kaessmann, H. (2019).  
550 Developmental dynamics of lncRNAs across mammalian organs and species.  
551 *Nature*, 571(7766), 510-514. doi:10.1038/s41586-019-1341-x
- 552 Sievers, F., Wilm, A., Dineen, D., Gibson, T. J., Karplus, K., Li, W., . . . Higgins, D.  
553 G. (2011). Fast, scalable generation of high-quality protein multiple sequence  
554 alignments using Clustal Omega. *Molecular Systems Biology*, 7, 539.  
555 doi:10.1038/msb.2011.75

- 556 Somel, M., Franz, H., Yan, Z., Lorenc, A., Guo, S., Giger, T., . . . Khaitovich, P.  
557 (2009). Transcriptional neoteny in the human brain. *Proc Natl Acad Sci U S A*,  
558 *106*(14), 5743-5748. doi:10.1073/pnas.0900544106
- 559 Tomancak, P., Berman, B. P., Beaton, A., Weiszmam, R., Kwan, E., Hartenstein,  
560 V., . . . Rubin, G. M. (2007). Global analysis of patterns of gene expression  
561 during *Drosophila* embryogenesis. *Genome Biol*, *8*(7), R145.  
562 doi:10.1186/gb-2007-8-7-r145
- 563 Uesaka, M., Kuratani, S., Takeda, H., & Irie, N. (2019). Recapitulation-like  
564 developmental transitions of chromatin accessibility in vertebrates. *Zoological*  
565 *Lett*, *5*, 33. doi:10.1186/s40851-019-0148-9
- 566 Von Baer, K. E. (1828). *Über Entwicklungsgeschichte Der Thiere*.
- 567 Wagner, R. A., Tabibiazar, R., Liao, A., & Quertermous, T. (2005). Genome-wide  
568 expression dynamics during mouse embryonic development reveal similarities to  
569 *Drosophila* development. *Dev Biol*, *288*(2), 595-611.  
570 doi:10.1016/j.ydbio.2005.09.036
- 571 Yanai, I., Peshkin, L., Jorgensen, P., & Kirschner, M. W. (2011). Mapping gene  
572 expression in two *Xenopus* species: evolutionary constraints and developmental  
573 flexibility. *Dev Cell*, *20*(4), 483-496. doi:10.1016/j.devcel.2011.03.015
- 574 Yang, Z. (1997). PAML: a program package for phylogenetic analysis by maximum  
575 likelihood. *Comput Appl Biosci*, *13*(5), 555-556.  
576 doi:10.1093/bioinformatics/13.5.555

577 Yang, Z., & Nielsen, R. (2000). Estimating synonymous and nonsynonymous  
578 substitution rates under realistic evolutionary models. *Mol Biol Evol*, 17(1), 32-43.  
579 doi:10.1093/oxfordjournals.molbev.a026236

580 Zhang, G., Fang, X., Guo, X., Li, L., Luo, R., Xu, F., . . . Wang, J. (2012). The oyster  
581 genome reveals stress adaptation and complexity of shell formation. *Nature*,  
582 490(7418), 49-54. doi:10.1038/nature11413

583

584

585 **Figures and figure legends**

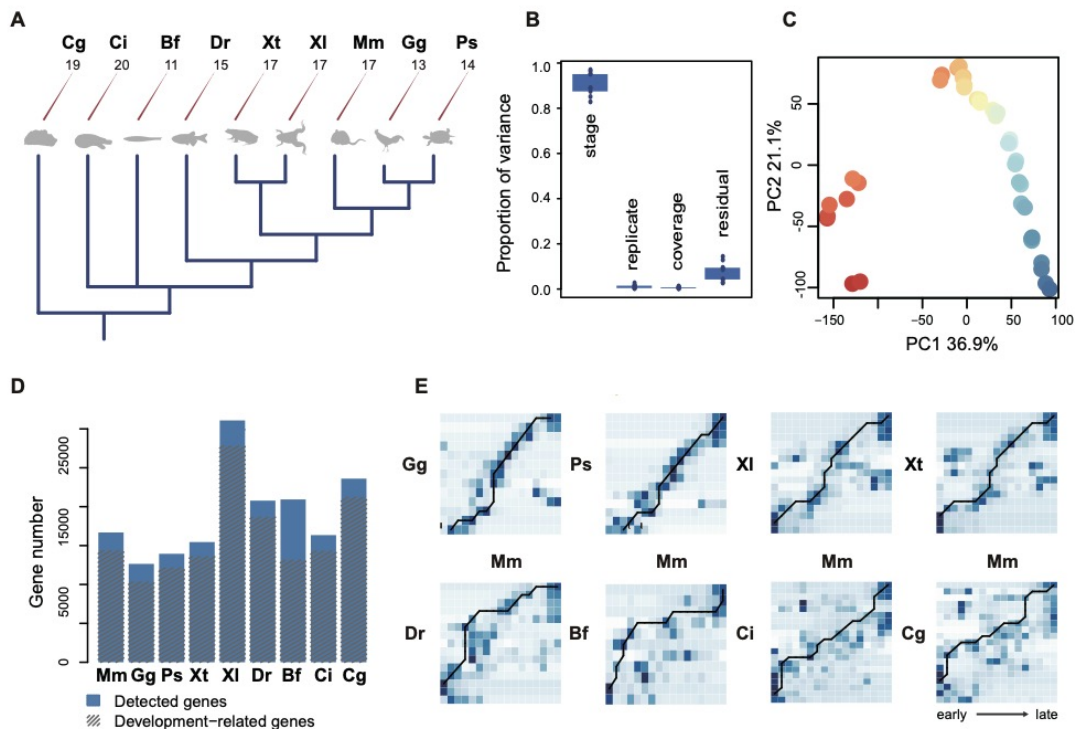

586

587 **Figure 1. Species phylogeny and alignment of embryonic development stages.**

588 **A** Experimental scheme showing the phylogenetic relationship among species (dark  
589 blue dendrogram) and numbers of sampled developmental stages. The abbreviations  
590 here and throughout the figures indicate species: Cg – oyster (*Crassostrea gigas*), Ci  
591 – ciona (*Ciona intestinalis*), Bf – amphioxus (*Branchiostoma floridae*), Dr – zebrafish  
592 (*Danio rerio*), Xt – Western clawed frog (*Xenopus tropicalis*), XI – African clawed  
593 frog (*Xenopus laevis*), Ps – turtle (*Pelodiscus sinensis*), Gg – chicken (*Gallus gallus*),  
594 Mm – mouse (*Mus musculus*). **B** Variance explained by different factors based on  
595 ANOVA. Boxes represent the interquartile values of the variance proportion  
596 explained by the factors listed on the x-axis among nine species. Dots represent the  
597 mean explained variance proportion for each species. **C** PCA plot based on the  
598 expression of 16,685 genes in mouse development. Dots represent samples, and color  
599 represents developmental stages (red – early, blue – late). **D** The number of detected  
600 and development-related genes in each species. **E** Heatmap showing the pairing  
601 scores reflecting overlap of stage-associate genes (darker shade of blue representing  
602 greater overlap) and the optimal alignment path calculated using the  
603 Needleman-Wunsch algorithm (black line).

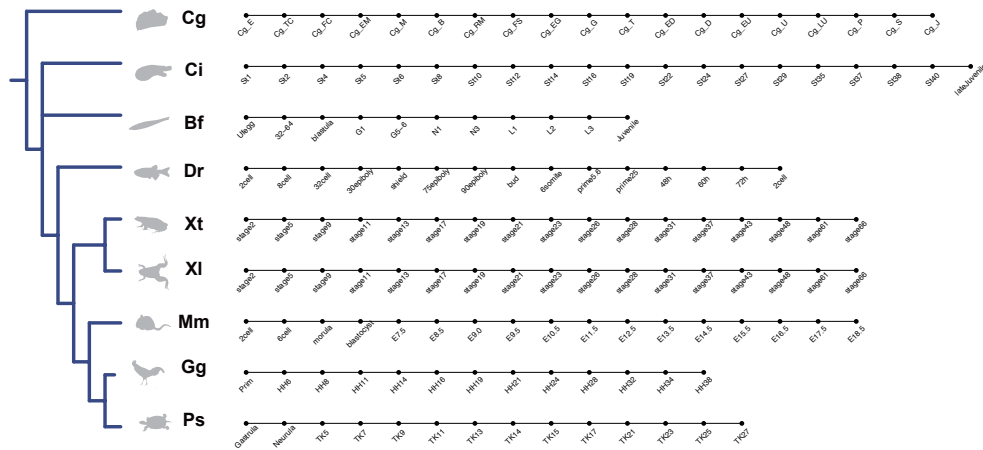

604

605 **Figure 1A–figure supplement 1. Illustration of sampled developmental stages for**  
606 **each species correspondent to Figure 1A.**

607 The dendrogram shows the phylogenetic relationship among species, indicated by  
608 silhouette figures and two-letter abbreviated species' classification names. Dots  
609 indicate sampled embryonic stages. Detailed sampled stage information is listed in  
610 Supplementary file 1: Table S1.

611



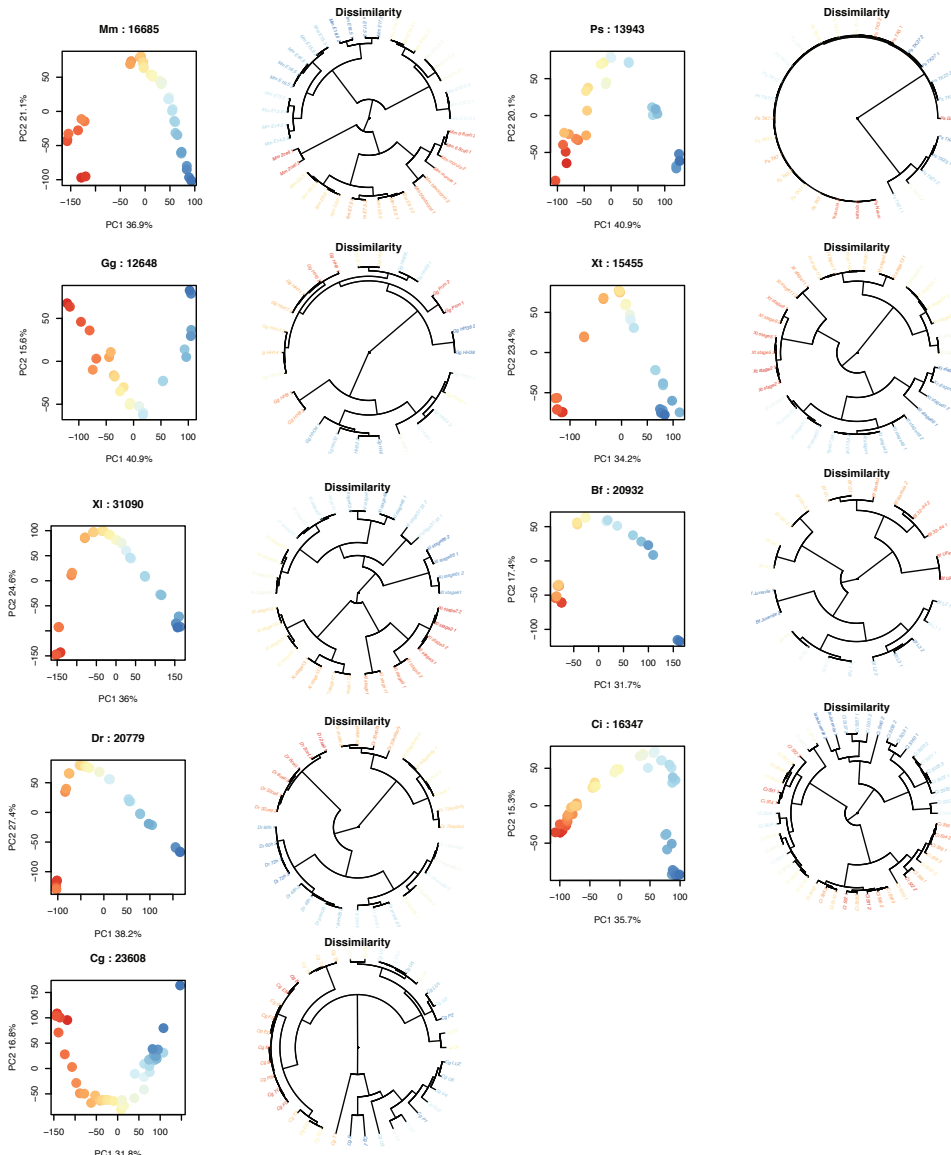

612

613 **Figure 1C–figure supplement 2. PCA plot and dendrogram based on expression**  
614 **variation within each species.**

615 Dots represent samples, color represents developmental stages (red – early, blue –  
616 late). Dendrograms were constructed using 1- Spearman correlation coefficient  
617 dissimilarity matrix. Panel titles show abbreviated species' identifiers and the number  
618 of expressed genes with FPKM > 1 in at least one developmental stage.

619

620

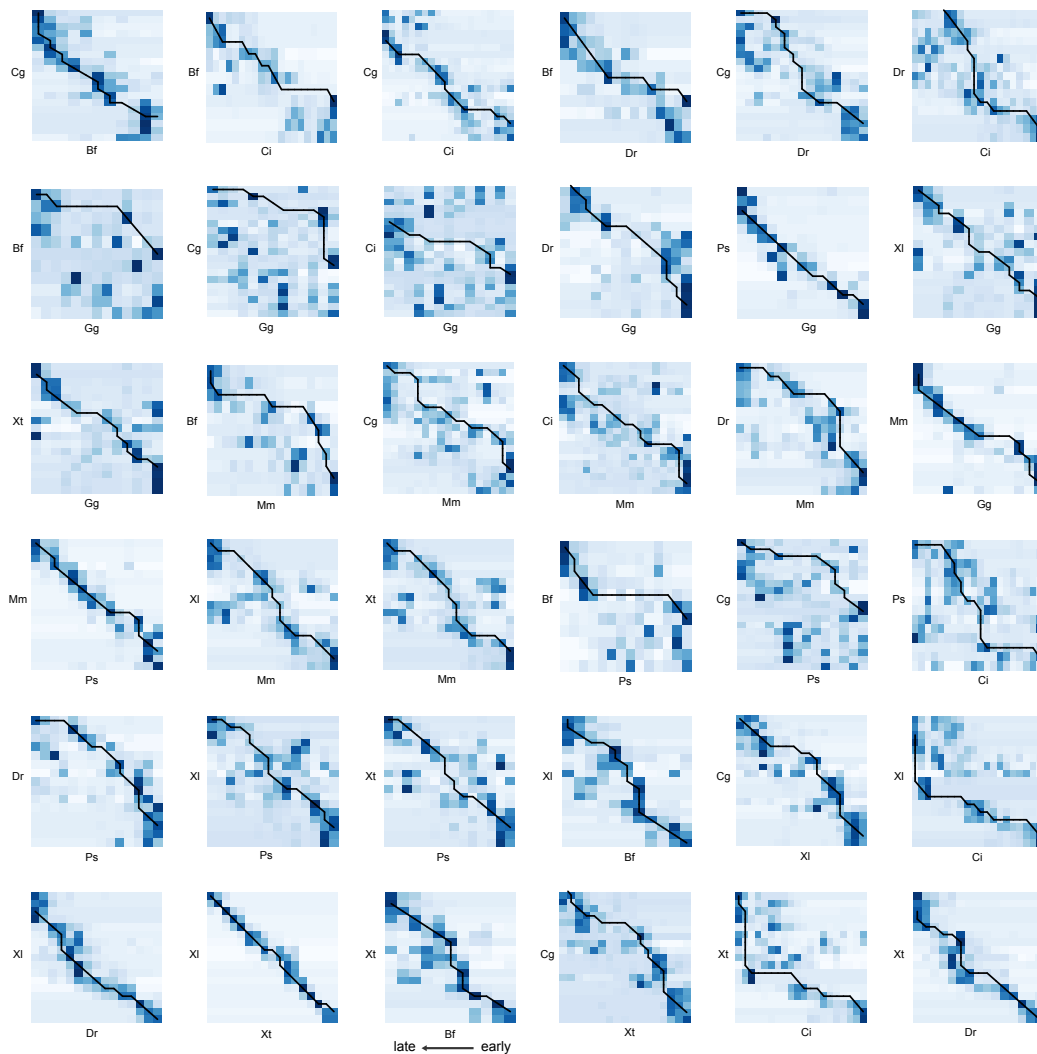

621

622 **Figure 1E–figure supplement 3. Heatmap of the pairing scores reflecting the**  
623 **overlap of stage-associate genes correspondent to Figure 1E.**

624 Darker shade of blue represents greater overlap of stage-associate genes. Black line  
625 represents the optimal alignment path calculated using the Needleman-Wunsch  
626 algorithm.

627

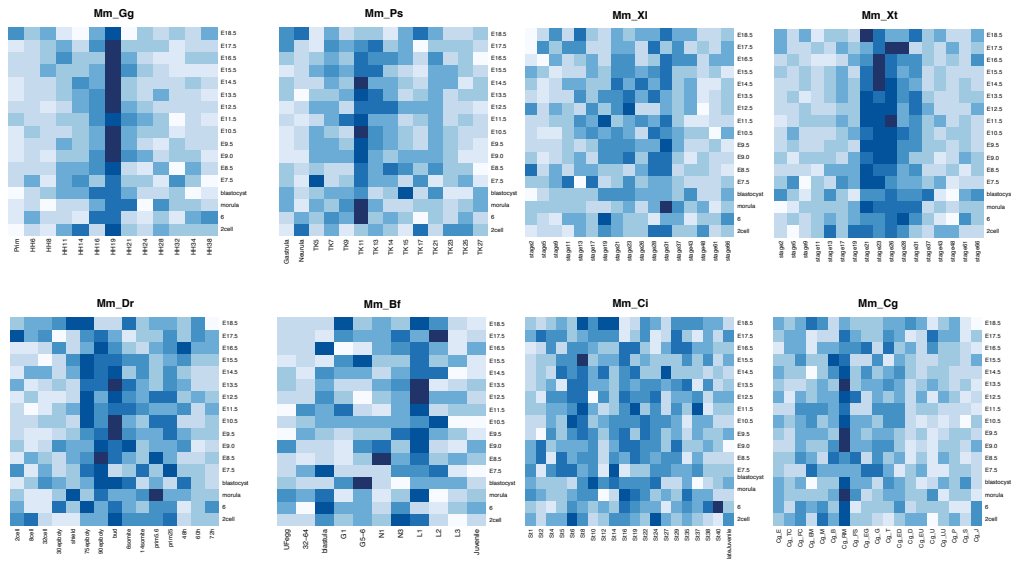

628

629 **Figure 1E–figure supplement 4. Heatmap of the average pairing scores calculated**  
630 **randomly assigned stage-associated genes correspondent to Figure 1E.**

631 The heatmap shows pairing scores based on the average of 500 iterations of random  
632 assignments of stage-specific gene labels. Panel titles show abbreviated species'  
633 identifiers. Darker shades of blue represent greater overlap between stages.

634

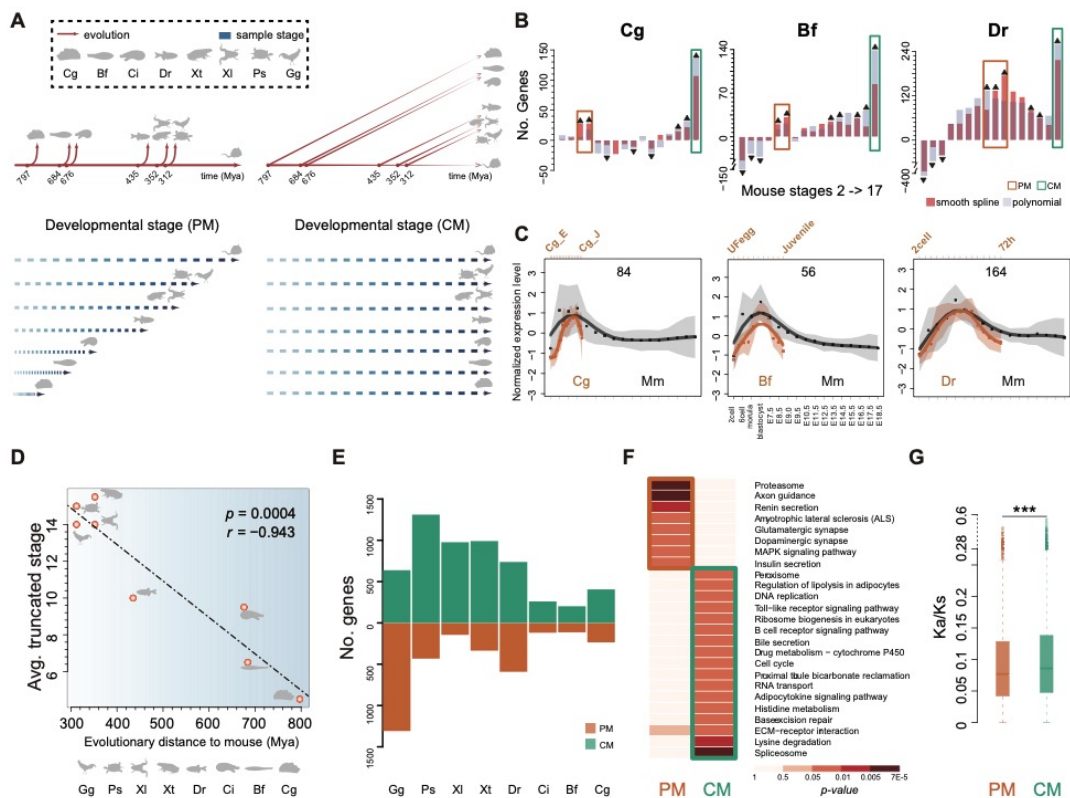

635

636 **Figure 2. Relationship of developmental gene expression patterns among species.**

637 **A** Schematic description of the progressive and continuous models and their predicted  
 638 alignment patterns. The progressive model (PM, left) involves an extension of  
 639 developmental program in more recently evolved species, thus predicting the best  
 640 alignment to a shortened mouse developmental course. The continuous model (CM,  
 641 right) predicts the best alignment to the complete developmental course. **B** Numbers  
 642 of genes showing the best expression trajectory's alignment between the complete  
 643 developmental course of the oyster (left), amphioxus (middle), and zebrafish (right)  
 644 and mouse developmental sets of different lengths: from two to 17 stages. Colors  
 645 indicate two methods used for developmental expression trajectory calculation: cubic  
 646 smooth spline (orange) and polynomial regression (gray). Colored rectangles mark  
 647 stages containing alignments fitting CM (green) or PM (orange) predictions. Black  
 648 triangles indicate the significantly greater (up) or lesser (down) number of genes  
 649 that expected by chance aligning to an indicated mouse developmental interval  
 650 (permutation test, BH-corrected  $p < 0.05$ ). **C** Examples of PM gene expression  
 651 patterns. Dots show the cluster-level standardized expression levels at each

652 developmental stage in mouse (black) and the other species (orange). The curves  
653 represent average expression profiles, and the shaded regions represent the standard  
654 deviation of curve estimates. **D** The relationship between the lengths of truncated sets  
655 of mouse stages containing maximal numbers of PM genes for each of the eight  
656 species and the phylogenetic distances to the mouse. Dots represent species. The  
657 dotted line marks the regression curve. The Pearson correlation coefficient and linear  
658 regression p-value are shown at the top right. Mya – millions of years ago. **E**  
659 Numbers of CM and PM genes identified in each of the eight species. Note that PM  
660 gene number in chicken (Gg) might be inflated due to poor resolution of PM and CM  
661 predictions at close phylogenetic distances. **F** KEGG pathways significantly enriched  
662 in PM or CM from all eight non-mouse species. The heat map shows the p-values of  
663 the enrichment tests. Colored rectangles mark significantly enriched KEGG pathways.  
664 **G** Amino acid sequence conservation ( $K_a/K_s$ ) of PM and CM genes from all eight  
665 non-mouse species. Asterisks indicate the significance of the difference (Wilcoxon  
666 rank-sum one-sided test,  $p < 0.0005$ ).

667

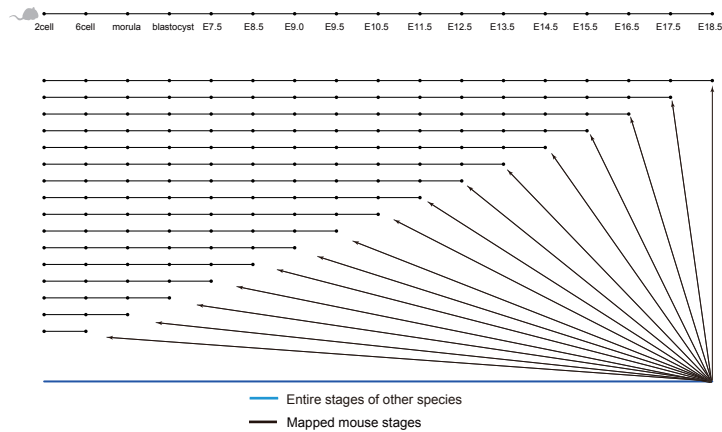

668

669 **Figure 2A–figure supplement 5. Schematic representation of the alignment**  
670 **procedure used to test the predictions of progressive and continuous models**  
671 **correspondent to Figure 2A.**

672 The scheme depicts an example of all possible alignments between the complete  
673 developmental series of a species (any of investigated species except mouse; blue line)  
674 and mouse developmental sets (black lines). The mouse developmental sets included  
675 the entire developmental series consisting of 17 sampled stages and developmental  
676 series progressively shortened by truncation of the last stage, down to the first two  
677 developmental stages. For each gene showing development-dependent expression in  
678 the two compared species, we then aligned the developmental profile of a species to the  
679 entire mouse developmental course and the increasingly truncated sets of mouse  
680 developmental stages. The continuous model (CM) predicts the best alignment of the  
681 amphioxus development to the complete mouse developmental course. The progressive  
682 model (PM) predicts the best alignment to the truncated developmental course. We  
683 used all possible truncated mouse developmental series, from 16 to two stages, to  
684 identify the best alignment to the mouse developmental series in an unbiased manner.

685

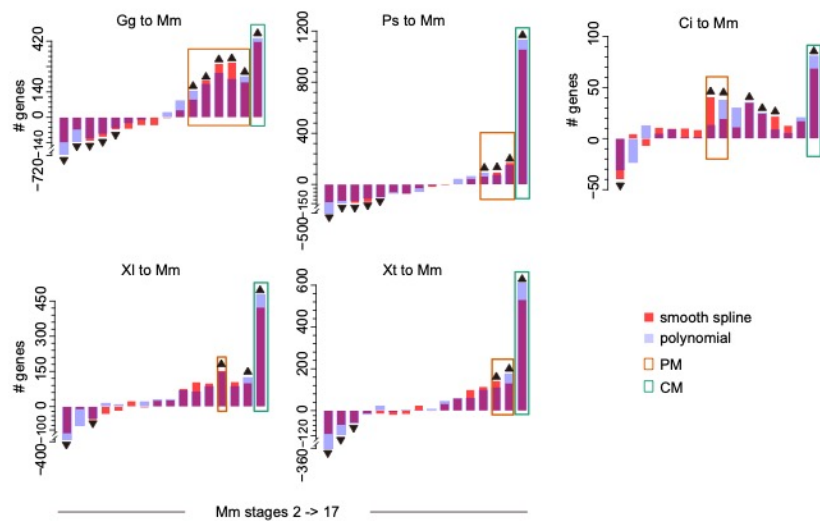

686

687 **Figure 2B–figure supplement 6. Numbers of genes showing the best expression**  
688 **trajectory’s alignment between the complete developmental course of five species**  
689 **and mouse developmental sets of different lengths: from two to 17 stages.**

690 Panel titles show abbreviated species’ identifiers. Colors indicate two methods used  
691 for developmental expression trajectory calculation: cubic smooth spline (orange) and  
692 polynomial regression (gray). Colored rectangles mark stages containing alignments  
693 fitting CM (green) or PM (orange) predictions. Black triangles indicate significantly  
694 greater (up) or lesser (down) number of genes than that expected by chance aligning  
695 to an indicated mouse developmental interval (permutation test, BH-corrected  $p <$   
696  $0.05$ ). The background distribution of gene numbers for subtraction was estimated by  
697 shuffling the orthologous relationships of mouse and a given species.

698

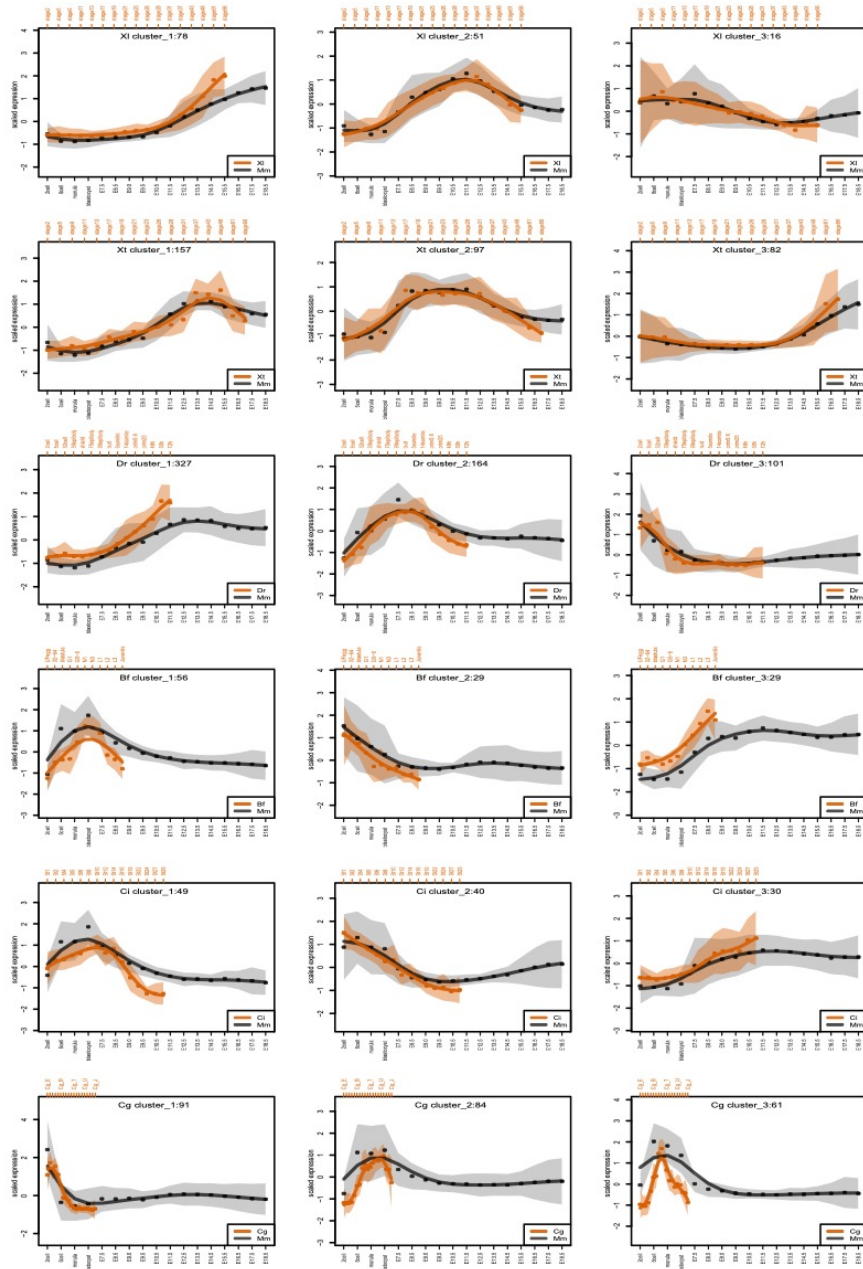

699

700 **Figure 2C – figure supplement 7. Examples of PM gene expression patterns**  
701 **correspondent to Figure 2C.**

702 Dots show the cluster-level standardized expression levels at each developmental  
703 stage in mouse (black) and the other species (orange). The curves represent average  
704 expression profiles and the shaded regions represent the standard deviation of curve  
705 estimates.

706



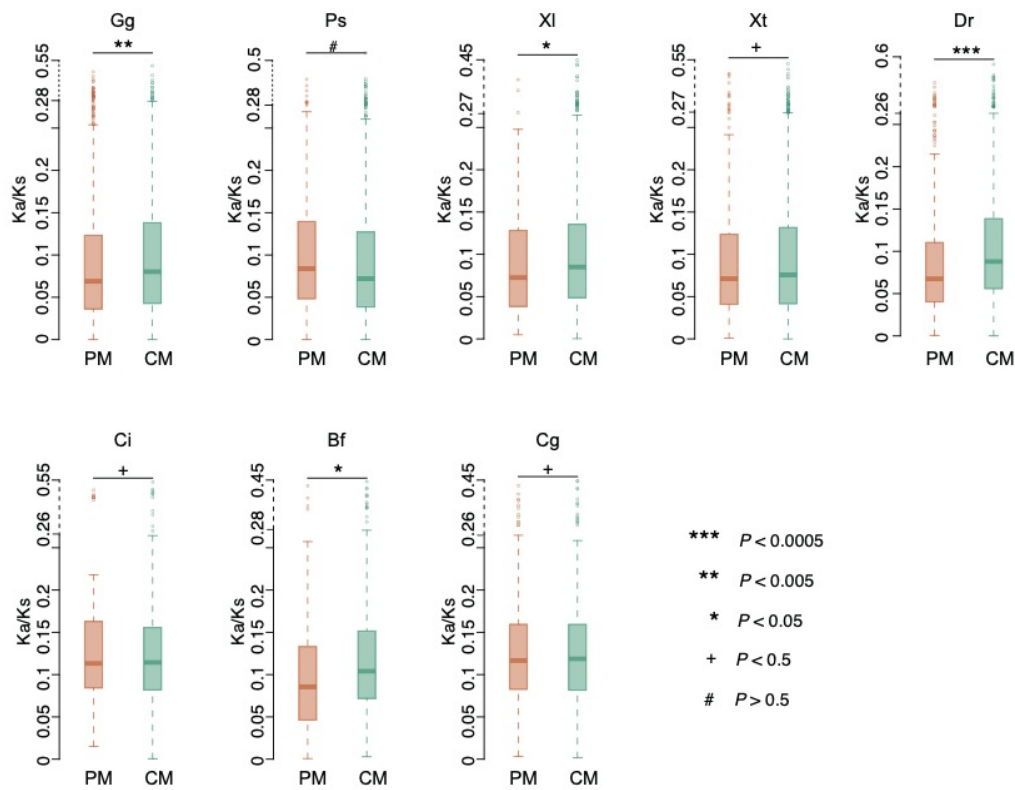

707

708 **Figure 2G – figure supplement 8. The distributions of Ka/Ks values of PM and**  
709 **CM genes in each non-mouse species correspondent to Figure 2G.**

710 Significance of the difference between the two distribution was assessed using  
711 one-sided Wilcoxon rank-sum test. \*\*\*,  $p < 0.0005$ , \*\*,  $p < 0.005$ , \*,  $p < 0.05$ , +,  $p <$   
712  $0.5$ , #,  $p > 0.5$ .

713

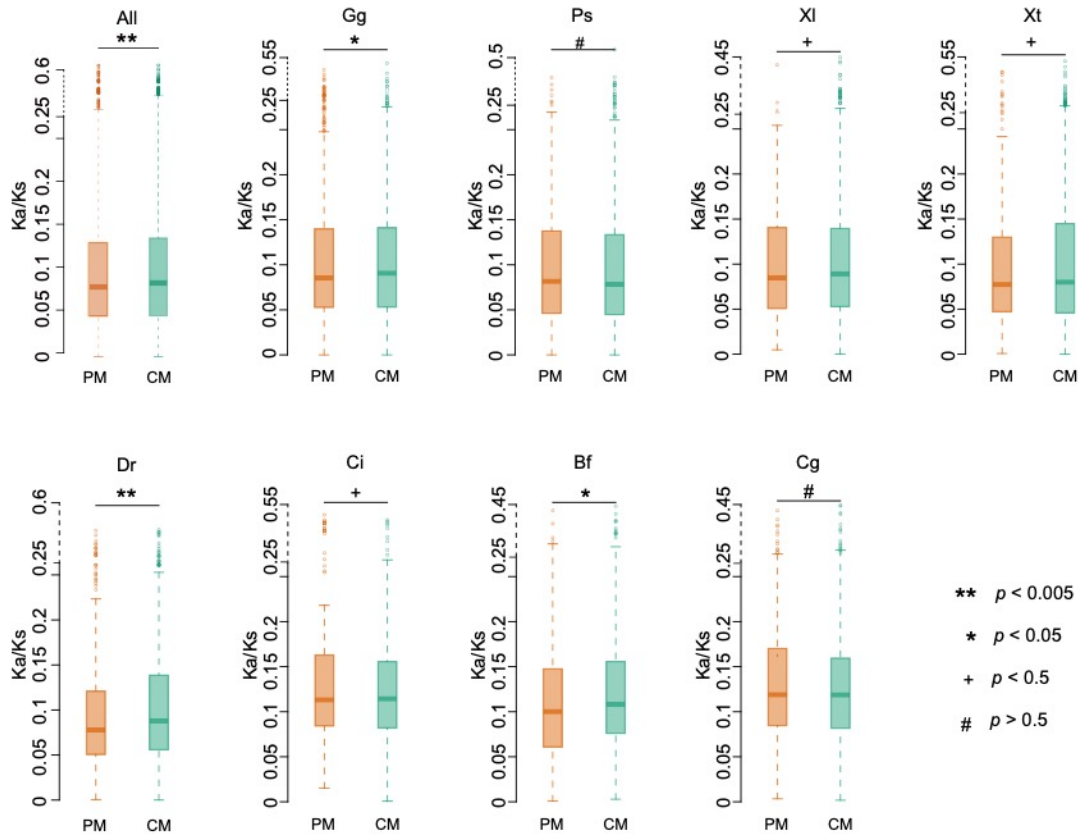

714

715 **Figure 2G – figure supplement 9. The distributions of Ka/Ks values of PM and**  
716 **CM genes in all species, and in each of the non-mouse species correspondent to**  
717 **Figure 2G.**

718 Significance of the difference between the two distributions was assessed using  
719 one-sided Wilcoxon rank-sum test. \*\*\*,  $p < 0.0005$ , \*\*,  $p < 0.005$ , \*,  $p < 0.05$ , +,  $p <$   
720  $0.5$ , #,  $p > 0.5$ . In contrast to results displayed in Figure 2G and Figure 2G – figure  
721 supplement 8, the Ka/Ks ratios here were estimated using multiple species alignment.

722

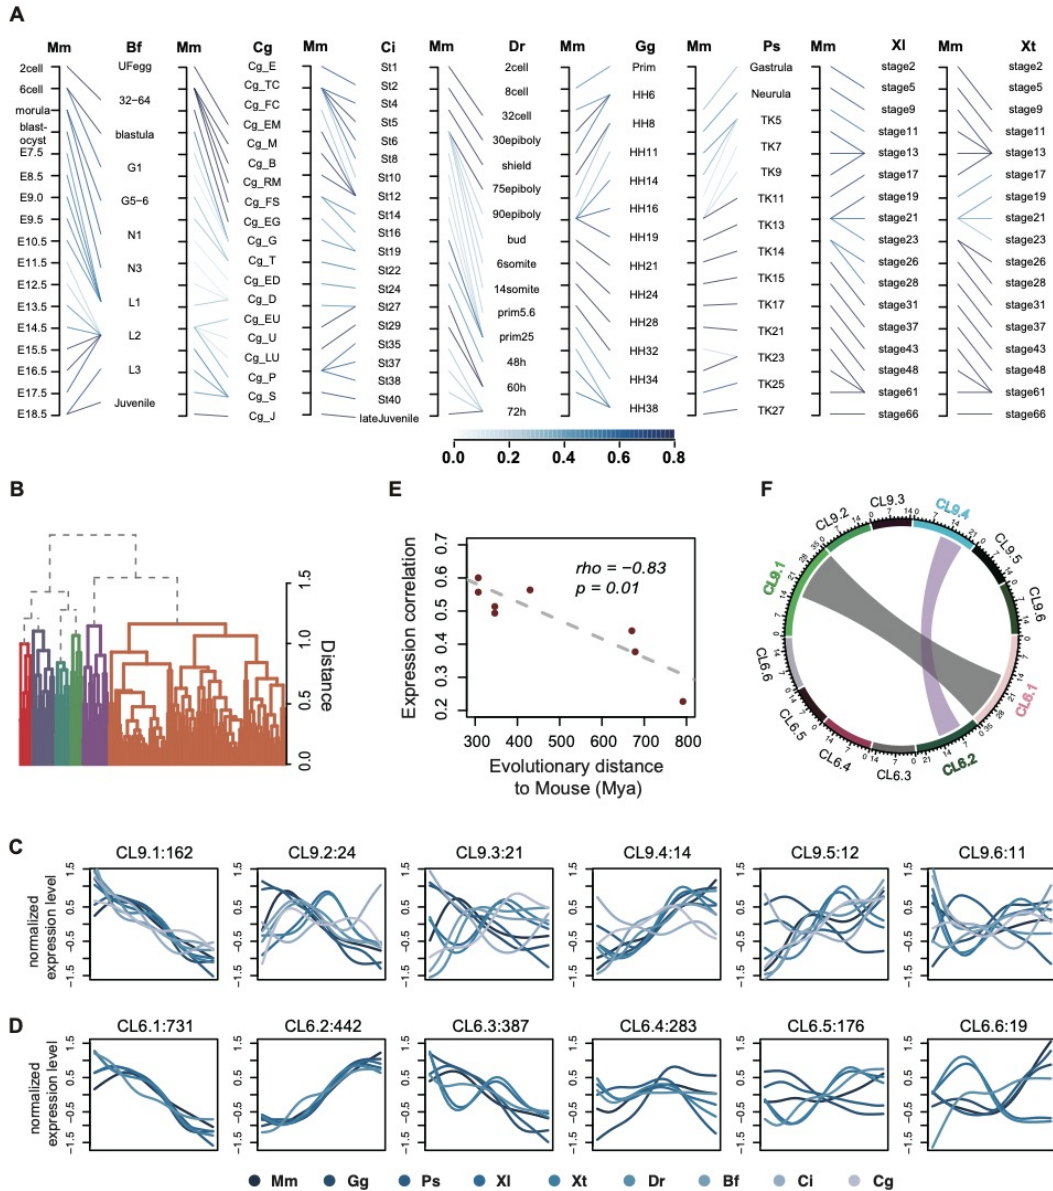

723

724 **Figure 3. Developmental expression of genes based on the species' alignment.**

725 **A** Pairwise alignment of developmental stages between mouse and the other species.

726 Thick lines represent alignments supported by technical replicates. Thicker lines

727 represent more stable alignments calculated by random subsampling of samples 500

728 times. **B** Hierarchical clustering of concatenated developmental gene expression

729 trajectories of 244 gene orthologs shared among nine species. Colors represent

730 clusters. **C** Developmental gene expression patterns in each of six clusters based on

731 nine-species gene orthologs. Colors represent species. Panel titles show cluster

732 identifiers and number of contained genes. **D** Developmental gene expression patterns

733 in each of six clusters based on six vertebrate species gene orthologs. Panel titles

734 show cluster identifiers and number of contained genes. **E** Relationship between the  
735 similarity of developmental gene expression patterns and phylogenetic distances. The  
736 expression similarity was calculated as the mean of Spearman correlation coefficients  
737 between mouse and non-mouse expression trajectories. **F** Chord graph indicating the  
738 relationship between clusters obtained using nine-species and six-species ortholog  
739 genes. Wider chords represent stronger connection between clusters.

740

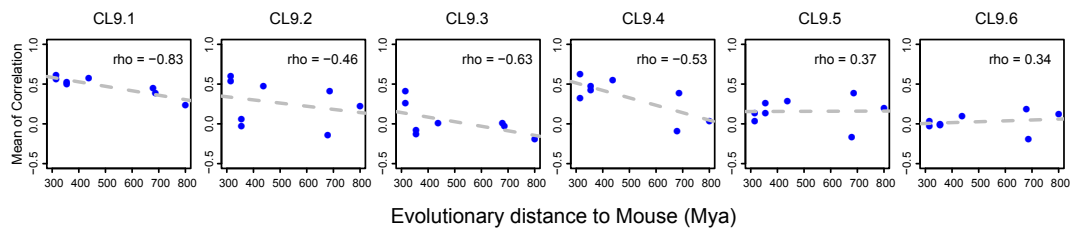

741

742 **Figure 3E – figure supplement 10. Relationship between the similarity of**  
743 **developmental gene expression patterns and phylogenetic distances**  
744 **correspondent to Figure 3E.**

745 The relationship is shown for each of six clusters of development-related genes  
746 orthologous among nine species. The expression similarity was calculated as the  
747 mean of Spearman correlation coefficients between mouse and non-mouse expression  
748 trajectories. The x-axis shows the phylogenetic distance to the mouse.

749

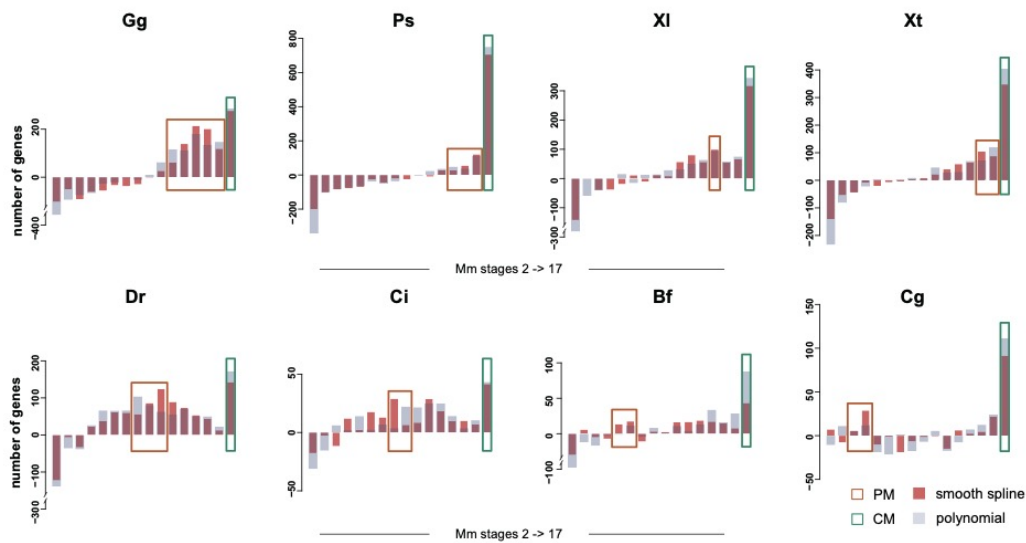

750

751 **Supplementary file 3: Figure S1. Numbers of genes showing the best expression**  
752 **trajectory's alignment between the complete developmental course of eight**  
753 **species and mouse developmental sets of different lengths: from two to 17 stages.**

754 Panel titles show abbreviated species' identifiers. Bar colors indicate two methods  
755 used for developmental expression trajectory calculation: cubic smooth spline (orange)  
756 and polynomial regression (purple). Colored rectangles mark stages containing  
757 alignments fitting CM (green) or PM (orange) predictions as in Figure 2B. The  
758 analysis was restricted to a subset of evolutionarily old genes inferred to exist back in  
759 *chordata* ancestor or earlier.

760

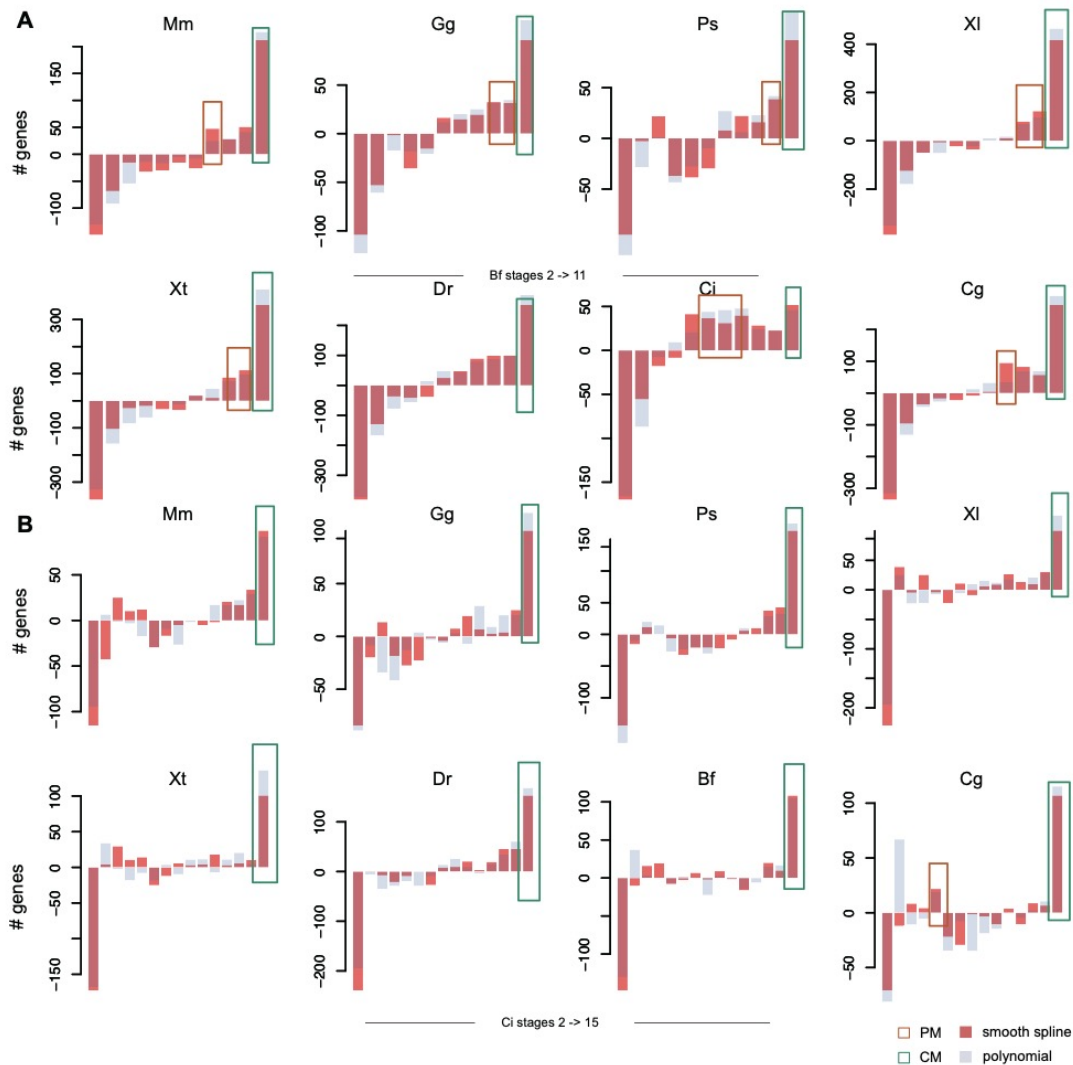

761

762 **Supplementary file 4: Figure S2. Numbers of genes showing the best expression**  
763 **trajectory's alignment between the complete developmental course of eight**  
764 **species and amphioxus (panel A) and ciona (panel B) developmental sets of**  
765 **different lengths.**

766 Panel titles show abbreviated species' identifiers. Bar colors indicate two methods  
767 used for developmental expression trajectory calculation: cubic smooth spline (orange)  
768 and polynomial regression (purple). Orange and green colored rectangles mark stages  
769 corresponding to alignments with significant excess of genes following PM and CM  
770 predictions respectively, as in Figure 2B.

771

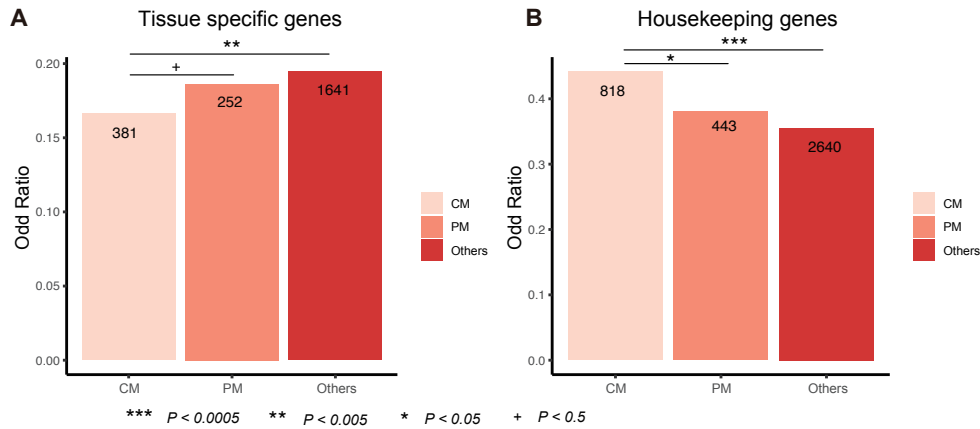

772

773 **Supplementary file 6: Figure S3. Tissue specificity of CM and PM genes.**

774 **A** Bars represent the ratio of tissue-specific and non-tissue specific genes for three  
775 gene groups. Numbers within bars show the number of tissue-specific genes in each  
776 group. **B** Bars represent the ratio of housekeeping and non-housekeeping genes.  
777 Numbers within bars show the number of housekeeping genes in each group. The  
778 significance of the differences between gene groups was assessed using one-sided  
779 Fisher's exact test. \*\*\*,  $p < 0.0005$ , \*\*,  $p < 0.005$ , \*,  $p < 0.05$ , +,  $p < 0.5$ .

780



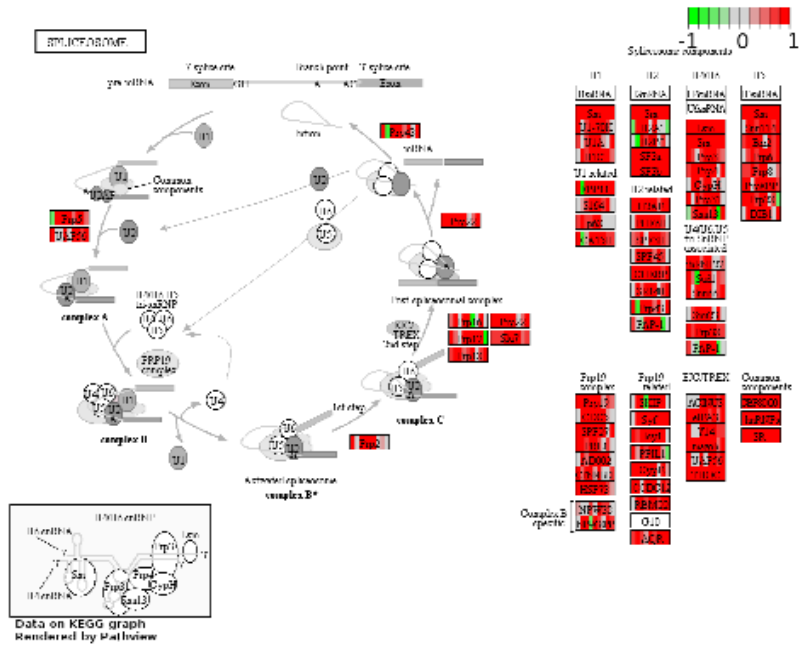

781

782 **Supplementary file 9: Figure S4. Visualization of spliceosome pathway showing**  
 783 **developmental expression profile correlation among nine species.**

784 Scheme shows mouse orthologs of spliceosome pathway genes present in nine species.  
 785 Colors indicate the coefficients of developmental expression profile correlations  
 786 estimated in all pairwise comparisons between mouse and the other eight species.

787

788 **Additional files**

789 **Figure 1D – source data1. Developmental related gene list of each species**  
790 **correspondent to Figure 1D.**

791 **Figure 2E – source data1.** The list of continuous model genes for each species

792 **Figure 2E – source data2.** The list of progressive model genes for each species

793 **Figure 2F – source data 1.** Enriched KEGG pathways for progressive model (PM)  
794 and continuous model(CM) genes correspondent to Figure 2F.

795 **Supplementary file 1: Table S1.** Sample information used in our study with raw file  
796 lists and the reads number.

797 **Supplementary file 2: Table S2.** The number of stages associated gene for each  
798 species

799 **Supplementary file 5: Table S3. Bonferroni-corrected p-values of overlapping**  
800 **CM genes between pairwise species**

801 **Supplementary file 7: Table S4.** Annotations and GO terms of overlapped genes  
802 between CM and CL9.1

803 **Supplementary file 8: Table S5.** Enriched GO functional annotation for  
804 developmental expression patterns CL1-6

805 **Supplementary file 10: Table S6.** Summary of expressed gene number for each  
806 species

807
